# Supplementary material
Source: PubMed Central journal article supplement (PMC3147518)
Supplement: supp_193_15_3710__1.pdf [file supp_193_15_3710__1.pdf]

# Structure-guided investigation of LPS O-antigen chain length regulators reveals regions critical for modal length control

Sergei Kalynych<sup>1,§</sup>, Xiang Ruan<sup>2,§</sup>, Miguel A. Valvano<sup>2</sup> and Miroslaw Cygler<sup>1,3,\*</sup>

## Supplementary information

Table S1, A list of oligonucleotides used for construction of chimeric genes. C\* refers to the forward primer for the PCR reaction 1 containing an overhang complementary to portion of the oligonucleotide D; B\* refers to the reverse primer for the PCR reaction 1 containing an overhang complementary to portion of the oligonucleotide C;

For the production of some chimeric genes where three fragments had to be synthesized in the first round of PCR (PCR reaction 1) the oligonucleotides are labeled C1 and C2 and B1 and B2.

WzzB\_ST\_F: cggcggcggcggccatgacagtggatagtaatac  
WzzB\_ST\_R: ctcggtcgcggccattacaaggcttttggcttatagc

WzzB\_SF\_F: cggcggcggcggccatgagagtagaaaataataatgtttc  
WzzB\_SF\_R: ctcggtcgcggccattacttcgcggttgaattacg

FepE\_F: cgaagcgaattcatgtcatcactgaatattaacag  
FepE\_R: ctaagtggtagccttaactaagtggtagcctcat

WzzB<sub>Eco157</sub>\_F: cgaagcgaattcatgaggacttggaaatttc  
WzzB<sub>Eco157</sub>\_R: ctaagtggtagccttacttcgcggttgaattacg

Internal oligonucleotides used in overlap PCR:

pSK1\_C\*: cgaatatttattggtagccttcagttc  
pSK1\_B\*: gaccaataaaattcgcctgcacttc

pSK2\_C: gcctattaccagacacgtcaaacctgttg  
pSK2\_B: gacgtgtctggtaataggccggagaaaagac

pSK3\_C: gaaaagcttaccatcgaaccttctgttaag  
pSK3\_B: gttcgatggtaagcttttcccgtctt

pSK4\_C: gtgagtactactgcagagggcgcacaaatg  
pSK4\_B: ctctgcagttgtactcacataagaaaccga

pSK5\_C: gcctattaccagacacgtcaaacctgttg  
pSK5\_B: gacgtgtctggtaataggccggagaaaagac

pSK6\_C: gatacgggtgcatgcttaccgctatgtg  
pSK6\_B: gtaagcatgcaccgtatcggcagtcacttt

pSK7\_C: gagacgttaataagccgctttagctctg  
pSK7\_B: gcttattaacgtctcctgcaaaccgatac

pSK8\_C: gaaaaacttaccattgaacagtcggta  
pSK8\_B: gttcaatggtaagtttttctggctcttcc

pSK9\_C: gttgggcaaaccgctgaaggggcgagcg  
pSK9\_B: ttcagcggtttgcccaacataagaaacagtcaa  
pSK10\_C: cgtatccgtcagatcgaagaagcgttgcgctatg  
pSK10\_B: cttcttcgatctgacggatacgcagatctttctgctcc

pSK11\_C: aactactatcagacgaagcagacactgctg  
pSK11\_B: gcttcgtctgatagtagtttggtgagaacacc

pSK12\_C: cttgatattcacgtctatcgttatgtgatg  
pSK12\_B: gatagacgtgaatatcaagatcatcaaactttaatttttc

pSK13\_C1: ttggcagtagcgaagaaaaatggacatccacg  
pSK13\_B1: gtccatTTTTCTTTCGCTACTGCCAAATAACCAAT  
pSK13\_C2: ggcgaattttattggtcgcttcagttctgc  
pSK13\_B2: aagcgaccaataaaaattcgcctgcacttcagag

pSK14\_C1: cgtatccgtcagatcgaagaagcgttgcgctatgc  
pSK14\_B1: gccgatacgggtgcatgcttaccgctatgtgatg  
pSK14\_C2: gcgcaacgcttcttcgatctgacggatacgcagatctttc  
pSK14\_B2: cggtaagcatgcaccgtatcggcagtcactttcag

pSK15\_C1: same as for pSK14;  
pSK15\_B1: same as for pSK14;  
pSK15\_C2: cggcctattaccagacagtcaaaacctgttg  
pSK15\_B2: ttgacgtgtctggtaataggccggagaaaagacc

pSK16\_C1: cgctatgcggatgaggccaaaatcacgcagccacaggtgacaaagccacag  
pSK16\_B1: ggcctcatccgcatagcgcaacgcttcttcgatctgacggatacgcagatctttc

pSK17\_C1: gttcctggtggggagcgatgcgctaaaatcgatgattaagcatgaagcgactcgt  
pSK17\_B1: tcgctccccaacaggaacatcgtgtcctgggtaacatcctggggttgctgaatctg  
cggtgctttgtcacctgcgctgattc

pSK18\_C: ctggacattaaaaatctgaaagtgactgccgatacgggtgcatgcttaccgctatgtgatg  
pSK18\_B: cagatttttaatgtccagcagtgctctgcttcgtctgatagtagtttggtgag

pSK19\_C: gtgactgccgatacgggtgcatgcttaccgctatgtgatg  
pSK19\_B: gttggatattgaaaaattaaaagtgactgccgatacgggtg

pSK20\_C1: catttctcctttgctatcatcaggtagcctac  
pSK20\_B1: catttctcctttgctatcatcaggtagcctac  
pSK20\_C2: gagacgttaataagccgcttttagctctgcg  
pSK20\_B2: ctaaagcggcttattaacgtctcctgcaaatccgatac

pSK21\_C1: cgtattaagcaaattcaggaagcgttgcagtatgc  
pSK21\_B1: cgcttcctgaatttgcttaatacgcagatctttttgc  
pSK21\_C2: gatcttgatattcacgtctatcgttatgtgatg  
pSK21\_B2: cgatagacgtgaatatcaagatcatcaaactt

pSK22\_C1: same as for pSK21  
pSK22\_D1: same as for pSK21  
pSK22\_C2: ccaaactactatcagacgaagcagacactgctgg  
pSK22\_D2: ctgcttcgctctgatagtagtttggtgagaacacc

pSK23\_C1: gcgttgcagtatgcgaatcaggcgcaggtgacaaaaccgcagattcagcaaaccag  
pSK23\_C2: gattcgcatactgcaacgcttcctgaatttgcttaatacgcagatcttttt  
pSK24\_C1: gatacgttgcttccttctagggagcgaagcgtggagtcgatgatacagaacgaagcga  
cgcgtc  
pSK24\_D1: tagaaggaacaacgtatcttgcgctcacatcttcagtctgctgaacctgtggctgcgctg  
atthttggcctcat

pSK25\_C: gatattgaaaaattaaagtttgatgatcttgatattcacgtctatcgttatgtgatgaag  
pSK25\_D: ctttaatttttcaatatccaacaggttttgacgtgtctggtaataggccggagaaaag

pSK26\_C: tttgatgatcttgatattcacgtctatcgttatgtg  
pSK26\_D: aatatcaagatcatcaaatttcagatthtttaatgtccag

The oligonucleotides from the list above were used in various combinations, to construct chimeric proteins containing double or triple swaps, (pSK27-pSK33). May need to include (pSK27-pSK33).

pSK36\_C: tacgttgcttccttttggggagcgaagcgcgtggagtcgatgggvcgacagcggatttgaacg  
pSK36\_D: ccccaaaaggaacaacgtgtcttgcgctcacatcttcagtctgctgaattcctgcccgcgtt  
ggcaat

pSK37\_C1: tggcagtagcgcaaaaatggaccagcgcggcgg  
pSK37\_C2: ccgggtaaggcaatcaccttgattctggcgg  
pSK37\_D1: ggtccatttttgcgctactgccaataaccaatagc  
pSK37\_D2: caaggtgattgccttaccggaccgtctthttttcac

pSK38\_D1: gccatgaccgtcttcccacgccacaactgcactag  
pSK38\_C2: ggcgtggcaagacgggtcatggcggctcgthttttgvcg  
pSK38\_D2: gagcagggtaccttacttvcgcttgtaattacgcagagcgttacgcaataaacvcgctac  
cacaagc

pSK40\_C: aagcccgttggcgcagacggtattgaacgcaaac  
pSK40\_D: gtctgcgccaacgggctttttaattcctgcc
